# Supplementary material for: Integrated molecular and functional characterization of the intrinsic apoptotic machinery identifies therapeutic vulnerabilities in glioma
Source: PubMed Central journal article supplement (PMC11582606; doi:10.1038/s41467-024-54138-9), 2024-11-21
Supplement: 41467_2024_54138_MOESM1_ESM.pdf [file 41467_2024_54138_MOESM1_ESM.pdf]

**Supplemental Table 1: Patient Characteristics**

| <b>Patient Tumours</b>                            | <b>Final Diagnosis</b>                             | <b>Tumour Status</b> | <b>Recurrence Number</b> | <b>Lobe</b>     | <b>Sex</b> |
|---------------------------------------------------|----------------------------------------------------|----------------------|--------------------------|-----------------|------------|
| PT144                                             | Glioblastoma, IDHw t, WHO Grade 4                  | Recurrent            | 3                        | Left Temporal   | F          |
| PT149                                             | Astrocytoma, IDHmt, WHO Grade 3                    | Primary              | 0                        | N/A             | F          |
| PT163                                             | Astrocytoma, IDHmt, WHO Grade 2                    | Primary              | 0                        | Right Temporal  | F          |
| PT201                                             | Oligodendroglioma, IDHmt, 1p19q_codel, WHO Grade 2 | Primary              | 0                        | Both Frontal    | M          |
| PT202                                             | Oligodendroglioma, IDHmt, 1p19q_codel, WHO Grade 2 | Primary              | 0                        | Left Frontal    | F          |
| PT211                                             | Glioblastoma, IDHw t, WHO Grade 4                  | Recurrent            | 2                        | Right Parietal  | F          |
| PT225                                             | Glioblastoma, IDHw t, WHO Grade 4                  | Recurrent            | 2                        | Left Frontal    | F          |
| PT239                                             | Glioblastoma, IDHw t, WHO Grade 4                  | Recurrent            | 1                        | Right Temporal  | M          |
| PT244                                             | Glioblastoma, IDHw t, WHO Grade 4                  | Recurrent            | 3                        | Right Parietal  | F          |
| PT245                                             | Glioblastoma, IDHw t, WHO Grade 4                  | Recurrent            | 1                        | Right Frontal   | F          |
| PT248                                             | Glioblastoma, IDHw t, WHO Grade 4                  | Primary              | 0                        | Right Frontal   | F          |
| PT265                                             | Glioblastoma, IDHw t, WHO Grade 4                  | Primary              | 0                        | Right Temporal  | M          |
| PT266                                             | Astrocytoma, IDHmt, WHO Grade 3                    | Primary              | 0                        | Right Temporal  | F          |
| PT268                                             | Astrocytoma, IDHw t, WHO Grade 3                   | Primary              | 0                        | Left Parietal   | F          |
| PT277                                             | Glioblastoma, IDHw t, WHO Grade 4                  | Recurrent            | 3                        | Right Parietal  | F          |
| PT280                                             | Astrocytoma, IDHmt, WHO Grade 2                    | Primary              | 0                        | Right Temporal  | M          |
| PT287                                             | Anaplastic Oligodendroglioma, WHO Grade 3          | Primary              | 0                        | N/A             | N/A        |
| PT304                                             | Glioblastoma, IDHw t, WHO Grade 4                  | Recurrent            | 3                        | Left Occipital  | F          |
| PT309                                             | Glioblastoma, IDHw t, WHO Grade 4                  | Primary              | 0                        | Left Parietal   | M          |
| PT327                                             | Astrocytoma, IDHmt, WHO Grade 4                    | Recurrent            | 2                        | Right Temporal  | M          |
| <b>Matched Patient Tumour &amp; Gliomaspheres</b> |                                                    |                      |                          |                 |            |
| PT/GS147                                          | Glioblastoma, IDHw t, WHO Grade 4                  | Recurrent            | 2                        | Right Parietal  | M          |
| PT/GS208                                          | Glioblastoma, IDHw t, WHO Grade 4                  | Primary              | 0                        | Right Temporal  | M          |
| PT/GS258                                          | Glioblastoma, IDHw t, WHO Grade 4                  | Primary              | 0                        | Right Temporal  | M          |
| <b>Gliomaspheres</b>                              |                                                    |                      |                          |                 |            |
| GBM39                                             | Glioblastoma, IDHw t, WHO Grade 4                  | Primary              | 0                        | Frontal         | M          |
| GS001                                             | Glioblastoma, IDHw t, WHO Grade 4                  | Primary              | 0                        | Right Parietal  | M          |
| GS005                                             | Glioblastoma, IDHw t, WHO Grade 4                  | Recurrent            | 2                        | Left Temporal   | M          |
| GS024                                             | Glioblastoma, IDHw t, WHO Grade 4                  | Primary              | 0                        | Right Temporal  | F          |
| GS025                                             | Glioblastoma, IDHw t, WHO Grade 4                  | Recurrent            | 4                        | Left Frontal    | F          |
| GS026                                             | Oligodendroglioma, IDHmt, 1p19q_codel, WHO Grade 3 | Recurrent            | 10                       | Right Frontal   | M          |
| GS027                                             | Glioblastoma, IDHw t, WHO Grade 4                  | Recurrent            | 3                        | Right Parietal  | F          |
| GS028                                             | Glioblastoma, IDHw t, WHO Grade 4                  | Recurrent            | 1                        | Right Parietal  | F          |
| GS054                                             | Glioblastoma, IDHw t, WHO Grade 4                  | Recurrent            | 1                        | Right Temporal  | F          |
| GS075                                             | Glioblastoma, IDHw t, WHO Grade 4                  | Primary              | 0                        | Left Frontal    | F          |
| GS081                                             | Glioblastoma, IDHw t, WHO Grade 4                  | Primary              | 0                        | Left Frontal    | F          |
| GS090                                             | Glioblastoma, IDHw t, WHO Grade 4                  | Recurrent            | 1                        | Right Parietal  | M          |
| GS100                                             | Glioblastoma, IDHw t, WHO Grade 4                  | Recurrent            | 2                        | Right Temporal  | M          |
| GS104                                             | Glioblastoma, IDHw t, WHO Grade 4                  | Primary              | 0                        | Left Parietal   | M          |
| GS108                                             | Astrocytoma, IDHmt, WHO Grade 4                    | Recurrent            | 1                        | Rgiht Occipital | M          |
| GS114                                             | Glioblastoma, IDHw t, WHO Grade 4                  | Primary              | 0                        | Right Temporal  | M          |
| GS116                                             | Glioblastoma, IDHw t, WHO Grade 4                  | Primary              | 0                        | Left Frontal    | M          |
| GS118                                             | Glioblastoma, IDHw t, WHO Grade 4                  | Recurrent            | 1                        | Right Temporal  | M          |
| GS121                                             | Glioblastoma, IDHw t, WHO Grade 4                  | Primary              | 0                        | Left Temporal   | M          |
| GS122                                             | Glioblastoma, IDHw t, WHO Grade 4                  | Recurrent            | 2                        | Right Temporal  | M          |
| GS187                                             | Glioblastoma, IDHw t, WHO Grade 4                  | Primary              | 0                        | Right Temporal  | F          |
| HK301                                             | Glioblastoma, IDHw t, WHO Grade 4                  | Primary              | 0                        | Left Parietal   | M          |
| HK336                                             | Glioblastoma, IDHw t, WHO Grade 4                  | Primary              | 0                        | Left Frontal    | M          |

**Supplemental Table 1: Patient and Model Characteristics**

Final diagnosis, tumour status, tumour location and sex for all glioma samples and derivative models in Figure 1. Headings are in bold text.

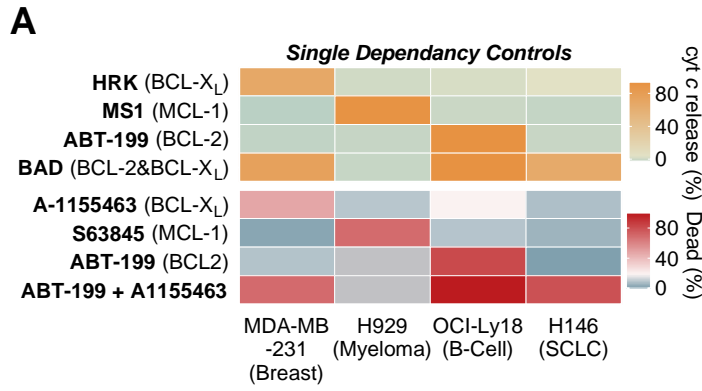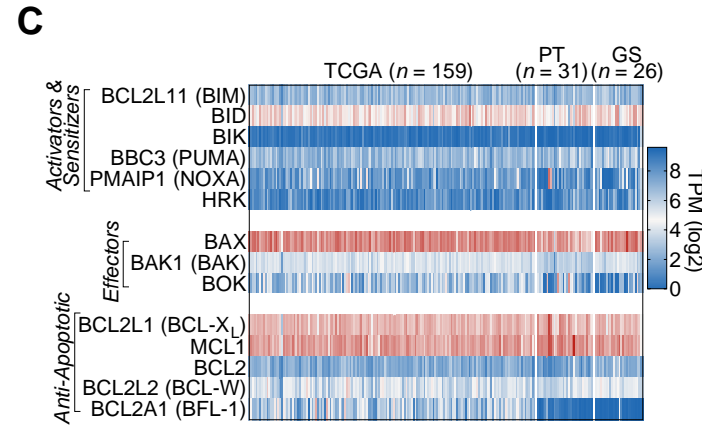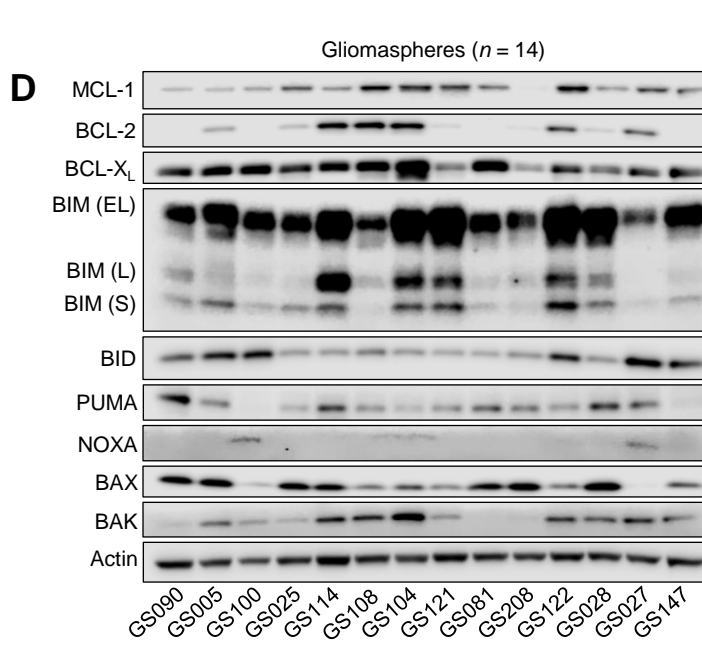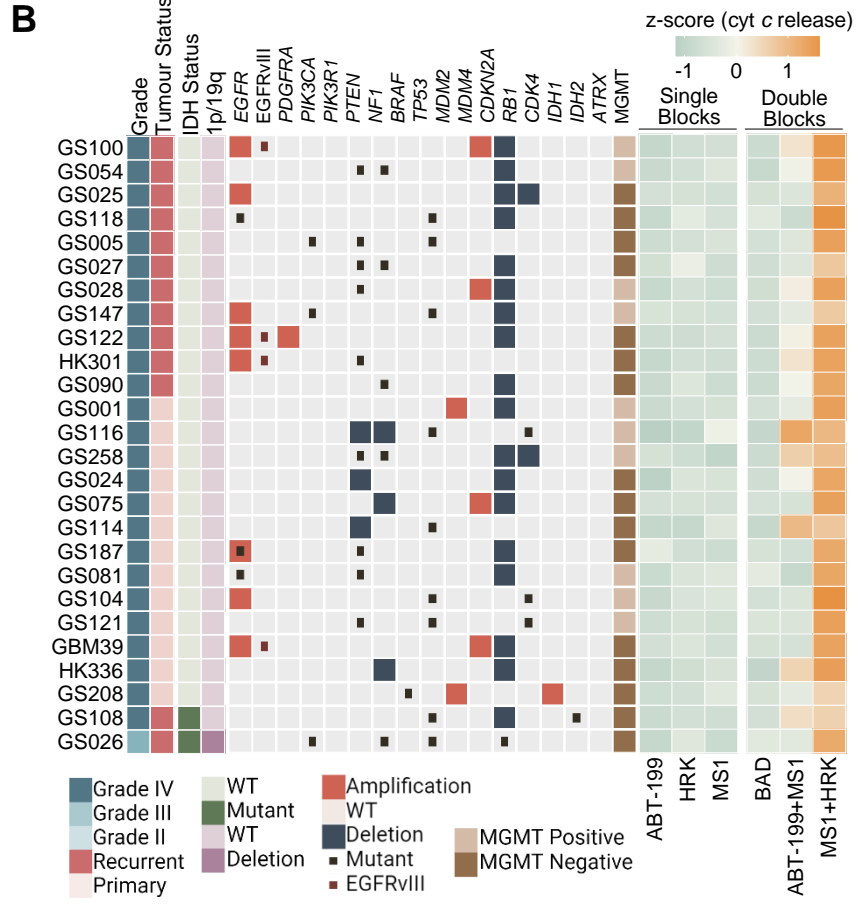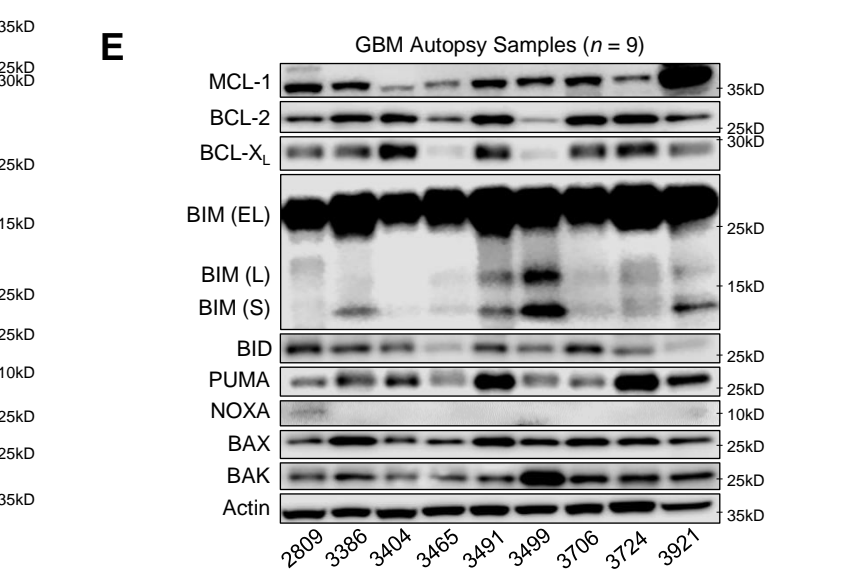

**Supplemental Figure 1: Molecular and functional characterization of the intrinsic apoptotic machinery in GBM identifies survival essential dependence on BCLXL and MCL1**

- A. BH3 profiling of anti-apoptotic blocks in non-GBM cancer cell lines. Peptide concentrations are as follows: ABT-199: 1 $\mu$ M, MS1: 10 $\mu$ M, HRK: 100 $\mu$ M, BAD: 10 $\mu$ M. Lower heatmap of cell viability (Cell Titer Glo) after 48 hrs. of treatment with 0.5 $\mu$ M ABT-199 (BCL2i), 0.5 $\mu$ M A1155463 (BCL-X<sub>L</sub>i), and 0.5 $\mu$ M S63856 (MCL1i).
- B. Heat maps describing gliomasphere clinical characteristics, copy number alterations and mutations and BH3 profiling of the apoptotic blocks. BH3 profiling is plotted as a z-score across the sample. Peptide concentrations are as follows: ABT-199: 1 $\mu$ M, MS1: 10 $\mu$ M, HRK: 100 $\mu$ M, BAD: 10 $\mu$ M.
- C. Assessment of RNA expression of the BCL2 protein family from GBM tumour cohort (TCGA,  $n = 159$ ), patient tumours ( $n = 31$ ) and gliomaspheres ( $n = 26$ ). Expression values in transcripts per million (TPM), log<sub>2</sub> transformed.
- D. Immunoblot analysis of the intrinsic apoptotic machinery in gliomaspheres ( $n = 13$ ).
- E. Immunoblot analysis of intrinsic apoptotic machinery in GBM autopsy samples ( $n = 9$ ) obtained from UCLA pathology.

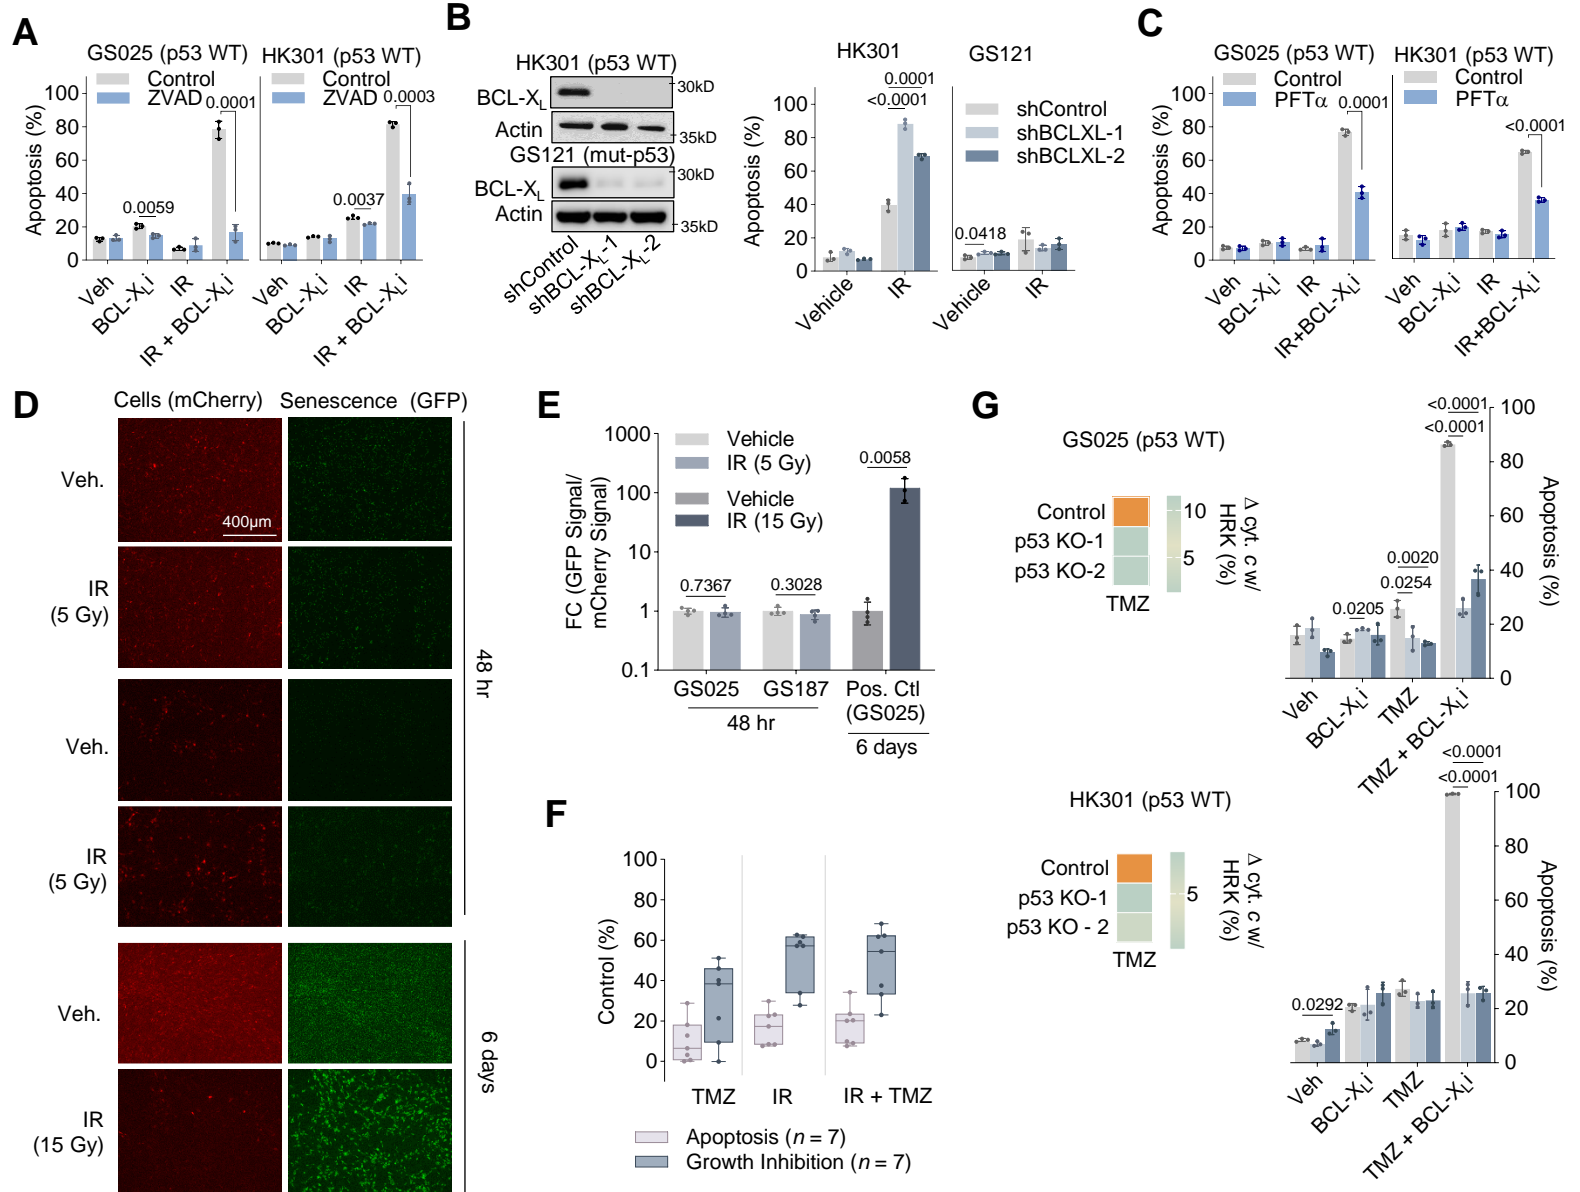

## Supplemental Figure 2: IR creates an exclusive survival dependency on BCL-X<sub>L</sub> in p53 wild-type GBM

- A. Apoptosis measured post treatment with BCL-X<sub>L</sub>.i, IR, or IR + BCL-X<sub>L</sub>.i. All condition were also combined with the pan caspase inhibitor ZVAD-fmk (50μM) (mean ± s.d., unpaired t test with Welch correction, *n* = 3 biological replicates).
- B. Short-hairpin RNAs were used reduce expression of BCL-X<sub>L</sub>. Apoptosis assessed after treatment with IR (mean ± s.d., unpaired t test with Welch correction, *n* = 3 biological replicates).
- C. Apoptosis was measured post treatment with BCL-X<sub>L</sub>.i, IR, or IR + BCL-X<sub>L</sub>.i. All condition were also combined with the p53 transcriptional inhibitor, PFTα (mean ± s.d., unpaired t test with Welch correction, *n* = 3 biological replicates).
- D. Representative images of senescence staining, 48 hours post treatment with 5 Gy IR. Positive control taken 16 days post treatment with 15 Gy IR. Images taken on EVOS M5000.
- E. Quantified signal of senescence staining, 48 hours post treatment with 5 Gy IR. Positive control taken 16 days post treatment with 15 Gy IR. Quantification perform on Incucyte (mean ± s.d., unpaired t test with Welch correction, *n* = 4 biological replicates). These results were independently repeated.
- F. Box plots of growth inhibition and apoptosis in patient-derived gliomaspheres (*n* = 7) treated with IR, TMZ or IR + TMZ. Each dot represents an individual gliomasphere and the mean of three biological replicates (mean ± s.d., unpaired t test with Welch correction).
- G. Dynamic BH3 profiling of p53 KOs after TMZ treatment, shows change in present cytochrome *c* release with HRK (mean ± s.d.). Cell death was evaluated in p53 KOs, 5 days after treatment with BCL-X<sub>L</sub>.i, TMZ, or TMZ+ BCL-X<sub>L</sub>.i (mean ± s.d., unpaired t test with Welch correction, *n* = 2 biological replicates for Dynamic BH3 profiling, *n* = 3 biological replicates for Annexin V/PI+).

IR (5gy), TMZ (50μM), BCL-X<sub>L</sub>.i (A1155463: 0.5μM).

DBP Assessed at 48 hours, peptide concentrations: HRK: 100μM.

Apoptosis (Annexin V/PI) assessed at 5 days. All box plots: mean, hinges at 25<sup>th</sup> and 75<sup>th</sup> percentiles, ± min to max

**A**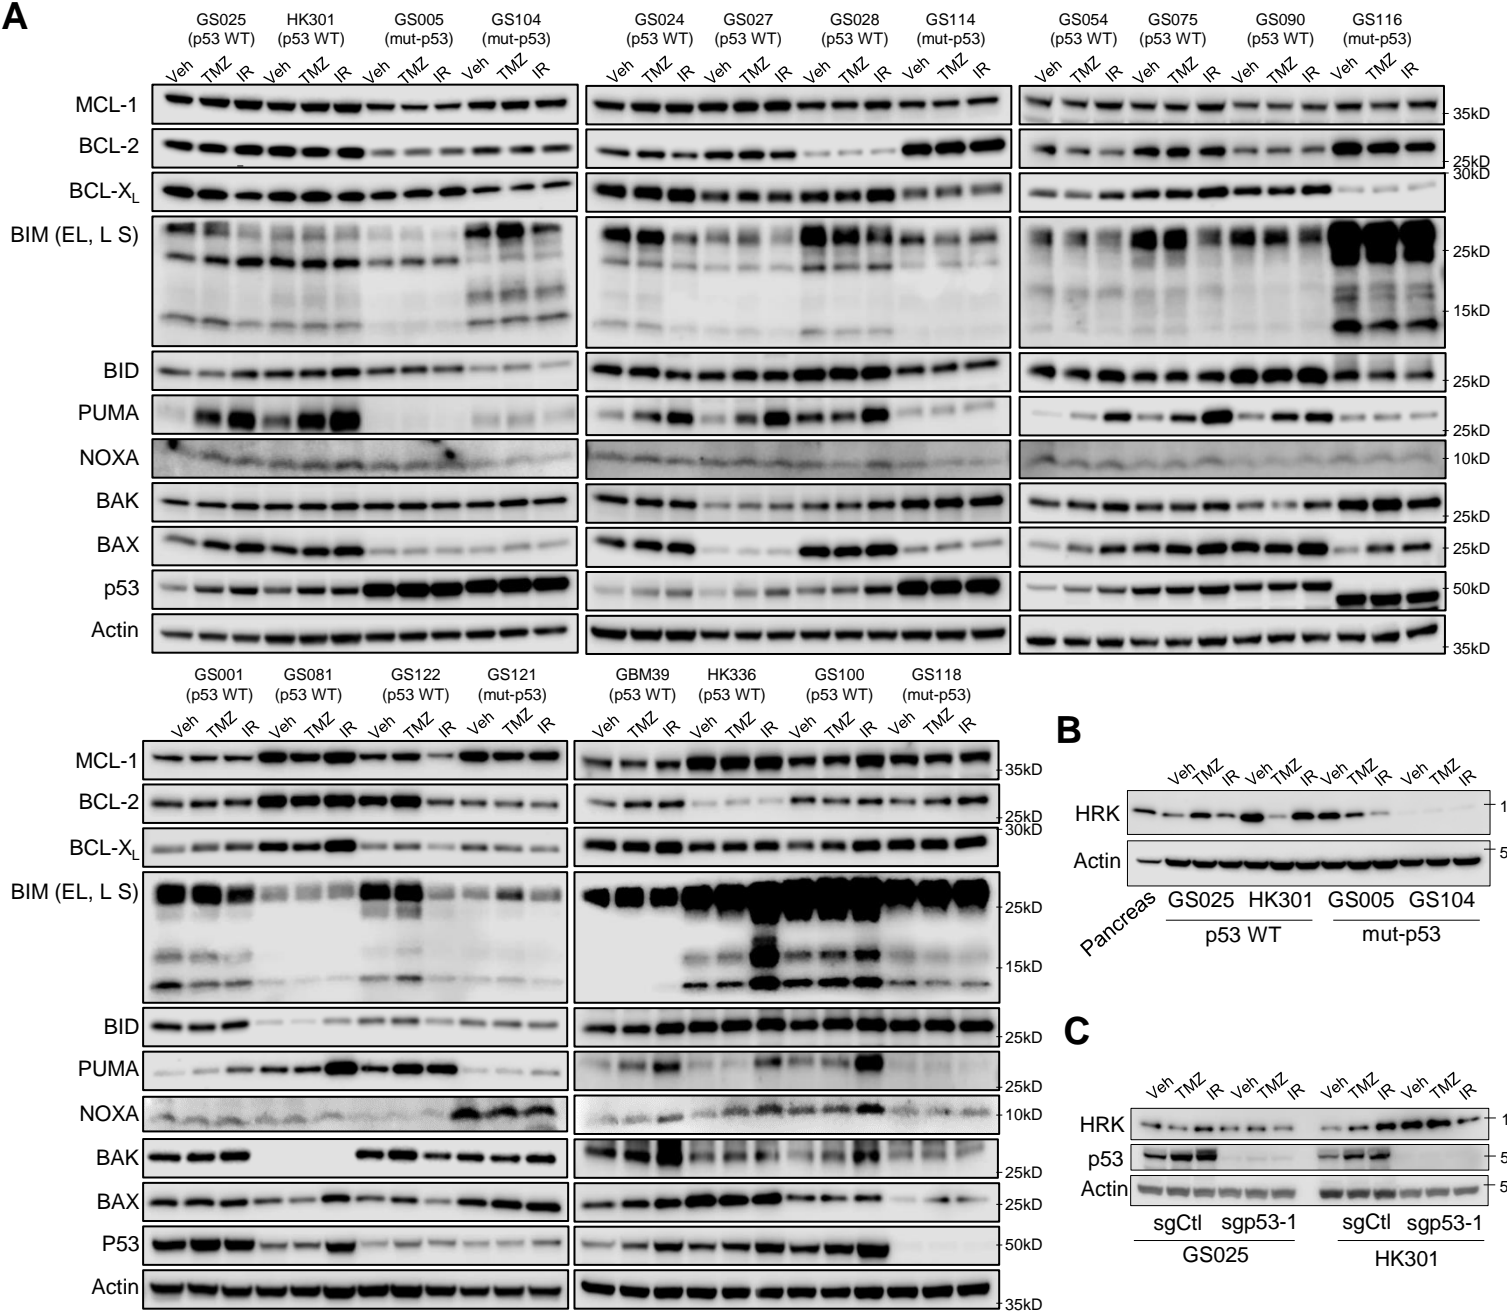**B**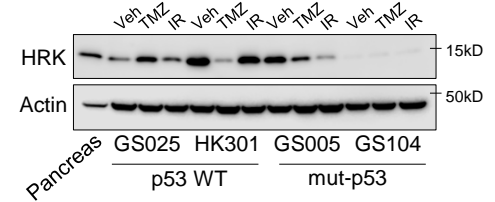**C**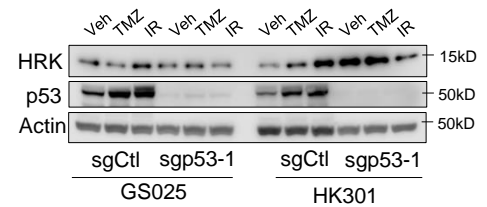**D**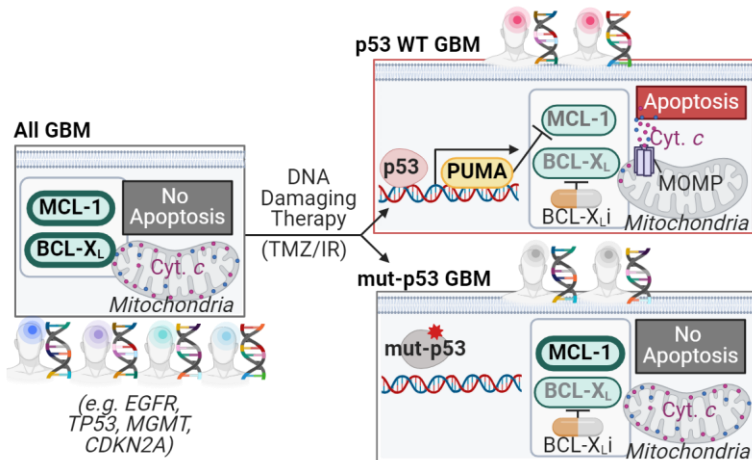

**Supplemental Figure 3: TMZ/IR upregulation of PUMA neutralizes MCL1 to create a BCLXL dependency**

- A. Immunoblots to assess changes in the expression of BCL2 family proteins 48 hours post TMZ (50 $\mu$ M) or IR (5 Gy) treatment across gliomaspheres ( $n = 19$ ).
- B. Immunoblots to assess changes in the expression of HRK 48 hours post TMZ (50 $\mu$ M) or IR (5 Gy) treatment across gliomaspheres ( $n = 4$ ).
- C. Immunoblots to assess changes in the expression of HRK 48 hours post TMZ (50 $\mu$ M) or IR (5 Gy) treatment in p53 KO gliomaspheres, GS025 and HK301.
- D. Graphic summary of the apoptotic blocks and their response to standard of care treatments in GBM.

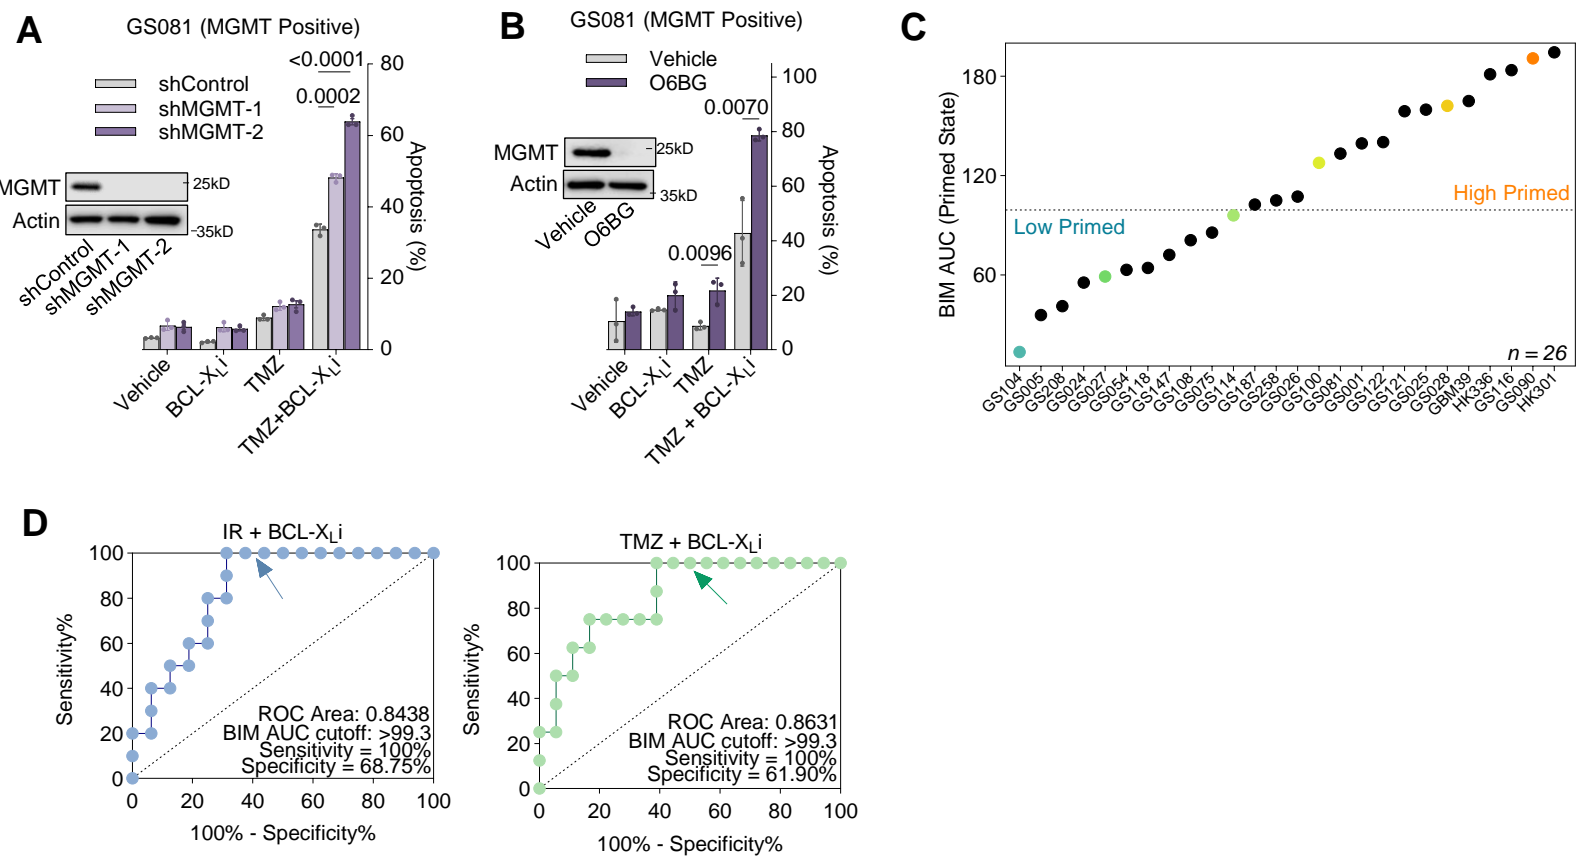

**Supplemental Figure 4: p53 status alone cannot predict response to IR/TMZ in combination with BCL-X<sub>L</sub>i**

- Short-hairpin RNAs were used reduce expression MGMT in MGMT positive, GS081. Immunoblots show expression of MGMT and Actin in GS081-shControl, shMGMT-1 and shMGMT-2. Apoptosis (Annexin V/PI+) was evaluated in GS081-shControl, shMGMT-1 and shMGMT-2, 5 days after treatment with A1155463 (BCL-X<sub>L</sub>i – 0.5μM), TMZ (50μM) or TMZ+A1155463 (mean ± s.d., unpaired t test with Welch correction, *n* = 3 biological replicates).
- Apoptosis was also evaluated with the listed treatments in panel A, combined with the irreversible MGMT inhibitor O6BG (40μM) (mean ± s.d., unpaired t test with Welch correction, *n* = 3 biological replicates).
- Basal BH3 profiling of gliomaspheres (*n* = 26) preformed with a titration of the BIM peptide (0μM, 0.01μM, 0.03μM, 0.1μM, 0.3μM, 1μM, 3μM, 10μM). Curve in the dynamic range (0.03μM - 3μM BIM) used to calculate area under the curve (AUC) to describe the primed state of these tumours. Colored dots match the colored curves in Figure 3C.
- Receiver Operator Curves (ROC) used to determine the priming cut-off where BIM<sup>AUC</sup> has the most sensitive prediction of cell death. Cut-off used to draw the line in panel C.

$p > 0.05 = \text{ns}$ ;  $p < 0.05 = *$ ;  $p < 0.01 = **$ ;  $p < 0.001 = ***$ ;  $p < 0.0001 = ****$

---

**Supplemental Table 2 - Model Descriptions**

---

| Abbreviation | Full formula                                                                                                                                                                                                                                                                            |
|--------------|-----------------------------------------------------------------------------------------------------------------------------------------------------------------------------------------------------------------------------------------------------------------------------------------|
| IMF          | BIMAU C*TP53 mutation*MGMT status*MDM2 amplification (p = 15)                                                                                                                                                                                                                           |
| GM           | RNA expression (p = 18,909) + Copy Number Alterations (p = 19,023) + Mutation calls (p = 213)                                                                                                                                                                                           |
| GM(*)        | Top RNA 1*Top RNA 2*... *Top CNA 1* top CNA 2*... *Top MUT 1*top MUT 2...<br>Up to three-way interactions between all top features in RNA, CNA and MUT. Selected by highest absolute Pearson correlations with the outcome IR/TMZ + BCLXLi-induced apoptosis. (p = 10,995 combinations) |
| IMF + GM     | BIMAU C*TP53 mutation*MGMT status*MDM2 amplification+ RNA+CNA+MUT (p = 15 + 18,909 + 19,023+ 213)                                                                                                                                                                                       |

---

**Supplemental Table 2: Model Descriptions**

Abbreviations and full formulas for the machine learning models.



A

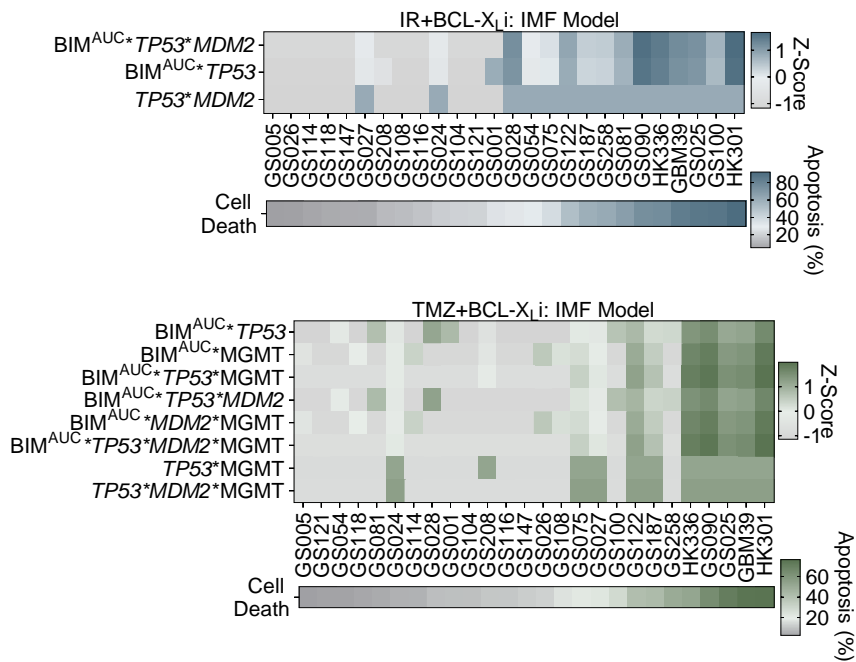

B

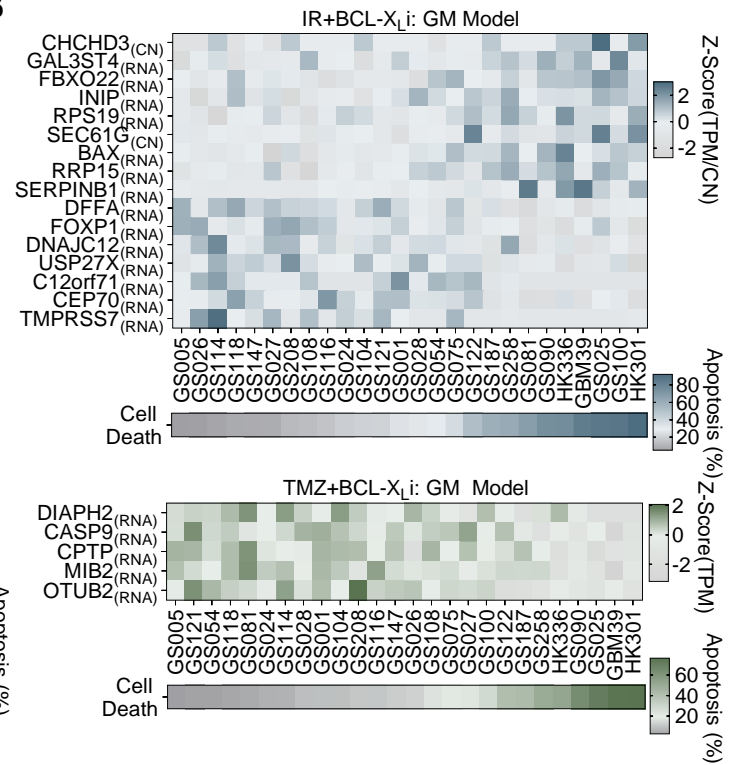

C

### IR + BCL-X<sub>L</sub>i ~ GM Features Descriptions

| Feature                   | Description                                                                      |
|---------------------------|----------------------------------------------------------------------------------|
| CHCHD3 <sub>(CN)</sub>    | Inner mitochondrial membrane scaffold protein                                    |
| GAL3ST4 <sub>(RNA)</sub>  | Galactose-3-O-sulfotransferase protein family                                    |
| FBXO22 <sub>(RNA)</sub>   | Member of the F-box protein, transcriptional target of the tumour protein p53    |
| INIP <sub>(RNA)</sub>     | Subunit of single-stranded DNA binding complexes, maintains genome stability     |
| RPS19 <sub>(RNA)</sub>    | Ribosomal protein that is a component of the 40S subunit                         |
| SEC61G <sub>(CN)</sub>    | Component of the protein translocation apparatus of the endoplasmic reticulum    |
| BAX <sub>(RNA)</sub>      | BCL2 protein family, functions as an apoptotic activator                         |
| RRP15 <sub>(RNA)</sub>    | Protein that co-purifies with human nucleoli                                     |
| SERPINB1 <sub>(RNA)</sub> | Member of the serpin family of proteinase inhibitors                             |
| DFFA <sub>(RNA)</sub>     | Substrate for caspase-3 and triggers DNA fragmentation during apoptosis          |
| FOXP1 <sub>(RNA)</sub>    | Tissue- and cell type-specific gene transcription, tumour sup.                   |
| DNAJC12 <sub>(RNA)</sub>  | Subclass of the HSP40/DnaJ protein family                                        |
| USP27X <sub>(RNA)</sub>   | Deubiquitinase that is involved in upregulation of the pro-apoptotic Bim protein |
| C12orf71 <sub>(RNA)</sub> | Chromosome 12 open reading frame 71                                              |
| CEP70 <sub>(RNA)</sub>    | Enables identical protein binding activity                                       |
| TMPRSS7 <sub>(RNA)</sub>  | Predicted to enable serine-type peptidase activity                               |

### TMZ + BCL-X<sub>L</sub>i ~ GM Features Descriptions

| Feature                 | Description                                                                             |
|-------------------------|-----------------------------------------------------------------------------------------|
| DIAPH2 <sub>(RNA)</sub> | Diaphanous subfamily of the formin homology family of proteins                          |
| CASP9 <sub>(RNA)</sub>  | Cysteine-aspartic acid protease (caspase) family, execution-phase of cell apoptosis     |
| CPTP <sub>(RNA)</sub>   | Enables ceramide 1-phosphate binding and ceramide 1-phosphate transfer activity         |
| MIB2 <sub>(RNA)</sub>   | E3 ubiquitin protein ligase that mediates ubiquitination in the Notch signaling pathway |
| OTUB2 <sub>(RNA)</sub>  | Deubiquitylating enzyme                                                                 |

## Supplemental Figure 5: Feature correlation and description for features chosen at least 10/26 rounds of LOOCV for IMF and GM models.

- Z-score of the individual features selected for IMF models describing IR/TMZ + BCL-X<sub>L</sub> cell death. The heatmap title formula is a high-level description before expanding to all possible combinations of interactions.
- Gene expression values for selected features by elastic net for the GM models describing IR/TMZ + BCL-XL cell death. Features displayed chosen at least 10/26 rounds of LOOCV. Z-score of log<sub>2</sub> transformed counts per million.
- Selected features by elastic net for GM models describing IR/TMZ + BCL-X<sub>L</sub> cell death with description summarizing gene function (paraphrased NCBI databases) displayed. Headings are in bold text.

Features pulled from RNA data set labeled as <sub>(RNA)</sub>, features pulled from copy number data set labeled as <sub>(CN)</sub>.

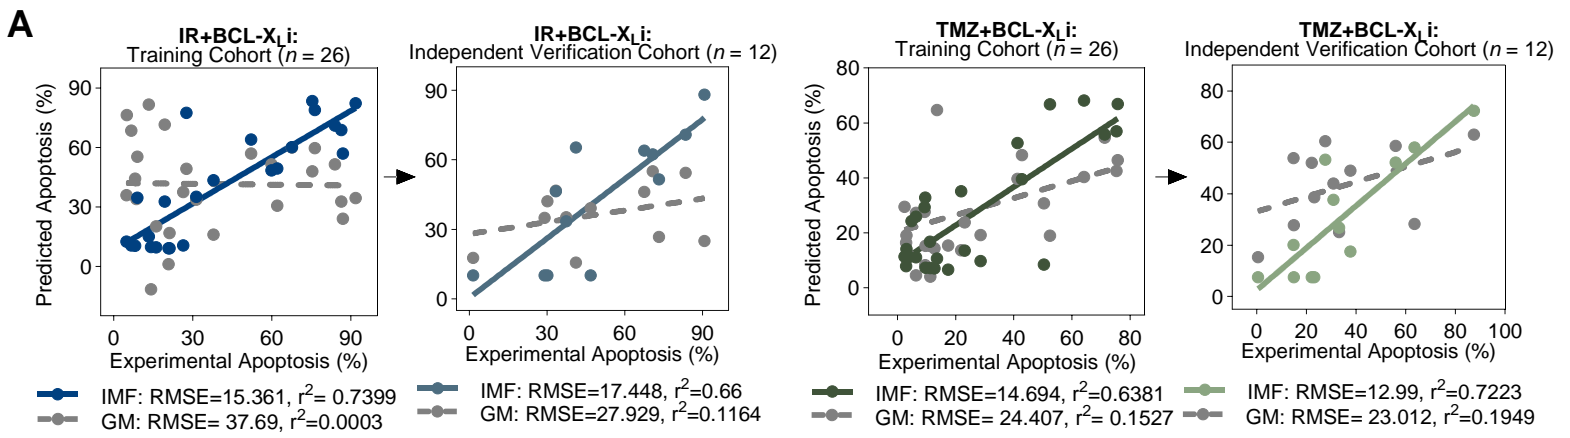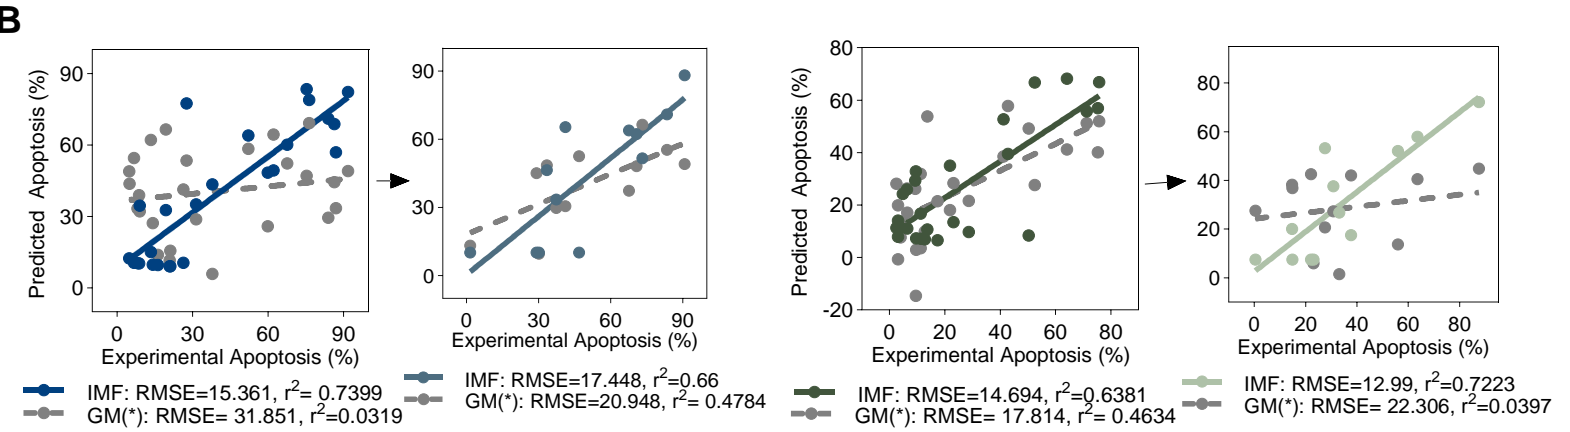

**C**

| IR + BCL-X <sub>L</sub> i ~ IMF + GM |       | TMZ + BCL-X <sub>L</sub> i ~ IMF + GM |       |
|--------------------------------------|-------|---------------------------------------|-------|
| permutation p value: 0.009           |       | permutation p value: 0.018            |       |
| feature                              | order | feature                               | order |
| BIM* TP53* MDM2                      | 1     | BIM* TP53* MDM2* MGMT                 | 1     |
| BIM* TP53                            | 2     | CASP9 <sub>(RNA)</sub>                | 2     |
| CASP9 <sub>(RNA)</sub>               | 4     | SCML1 <sub>(RNA)</sub>                | 4     |
| CCKBR <sub>(RNA)</sub>               | 4     | SH2D7 <sub>(RNA)</sub>                | 4     |
| SNAP23 <sub>(RNA)</sub>              | 5     | GUK1 <sub>(RNA)</sub>                 | 5     |
| FBXO22 <sub>(RNA)</sub>              | 8     | COBL1 <sub>(RNA)</sub>                | 6     |
| RNF225 <sub>(RNA)</sub>              | 8     | RAB3B <sub>(RNA)</sub>                | 8     |
| SEC61G <sub>(CN)</sub>               | 8     | RAB43 <sub>(RNA)</sub>                | 8     |
| ADGRG5 <sub>(RNA)</sub>              | 11    | TCAF1 <sub>(RNA)</sub>                | 9     |
| KRTAP19.8 <sub>(RNA)</sub>           | 11    | PRADC1 <sub>(RNA)</sub>               | 11    |
| CHCHD3 <sub>(CN)</sub>               | 11    | TM4SF20 <sub>(RNA)</sub>              | 11    |

**Supplemental Figure 6: Integrated profiling outperforms global transcriptomic and genomic data sets**

- A. Comparison of experimental and predicted values via simple linear regression for the IMF and GM models
- B. Comparison of experimental and predicted values via simple linear regression for the IMF and GM(\*) models
- C. Rank of pooled IMF + GM features based on retention in LASSO with increasing penalization.

Features pulled from RNA data set labeled as <sub>(RNA)</sub>, features pulled from copy number data set labeled as <sub>(CN)</sub>.

**Supplemental Table 3: Patient Characteristics - Independent Verification Cohort**

| <b>Gliomaspheres</b> | <b>Final Diagnosis</b>            | <b>Tumour Status</b> | <b>Recurrence Number</b> | <b>Lobe</b>    | <b>Sex</b> |
|----------------------|-----------------------------------|----------------------|--------------------------|----------------|------------|
| GS055                | Glioblastoma, IDHw t, WHO Grade 4 | Recurrent            | unknown                  | Left Temporal  | M          |
| GS074                | Glioblastoma, IDHw t, WHO Grade 4 | Primary              | 0                        | Left Temporal  | M          |
| GS158                | Glioblastoma, IDHw t, WHO Grade 4 | Recurrent            | 3                        | Left Occipital | M          |
| GS176                | Glioblastoma, IDHw t, WHO Grade 4 | Primary              | 0                        | Left Temporal  | F          |
| GS180                | Glioblastoma, IDHw t, WHO Grade 4 | Recurrent            | 1                        | Left Temporal  | F          |
| GS220                | Glioblastoma, IDHw t, WHO Grade 4 | Primary              | 0                        | Left Temporal  | F          |
| GS227                | Glioblastoma, IDHw t, WHO Grade 4 | Primary              | 0                        | Right Parietal | F          |
| GS243                | Glioblastoma, IDHw t, WHO Grade 4 | Primary              | 0                        | Right Temporal | M          |
| GS248                | Glioblastoma, IDHw t, WHO Grade 4 | Primary              | 0                        | Right Frontal  | F          |
| GS304                | Glioblastoma, IDHw t, WHO Grade 4 | Recurrent            | 2                        | Left Occipital | F          |
| GS306                | Glioblastoma, IDHw t, WHO Grade 4 | Recurrent            | 1                        | Left Parietal  | F          |
| GS319                | Glioblastoma, IDHw t, WHO Grade 4 | Primary              | 0                        | Right Parietal | M          |

**Supplemental Table 3: Patient Characteristics**

Final diagnosis, tumour status, tumour location and sex for the glioma samples used to derive the gliomaspheres in the validation cohort. Headings are in bold text.

| <b>Supplemental Table 4: Features for IMF, GM and GM(*) models</b>         |              |           |                     |
|----------------------------------------------------------------------------|--------------|-----------|---------------------|
| <b>Feature</b>                                                             | <b>Coef.</b> | <b>SD</b> | <b>Stand. Coef.</b> |
| <b>IR + BCL-X<sub>Li</sub> ~ IMF Model</b>                                 |              |           |                     |
| (Intercept)                                                                | 10.2         |           |                     |
| BIM <sup>AUC</sup> *TP53                                                   | 0.11         | 72.09     | 8.15                |
| BIM <sup>AUC</sup> *TP53*MDM2                                              | 0.26         | 73.97     | 19.57               |
| <b>TMZ + BCL-X<sub>Li</sub> ~ IMF Model</b>                                |              |           |                     |
| (Intercept)                                                                | 7.48         |           |                     |
| BIM <sup>AUC</sup> *TP53*MDM2                                              | 0.09         | 73.97     | 6.74                |
| BIM <sup>AUC</sup> *TP53*MGMT                                              | 0.1          | 72.92     | 7.18                |
| BIM <sup>AUC</sup> *TP53*MDM2*MGMT                                         | 0.12         | 73.63     | 9.17                |
| <b>IR + BCL-X<sub>Li</sub> ~ GM Model</b>                                  |              |           |                     |
| (Intercept)                                                                | -125.57      |           |                     |
| CHCHD3 <sub>(CN)</sub>                                                     | 8.82         | 0.38      | 3.38                |
| GAL3ST4 <sub>(RNA)</sub>                                                   | 8.30         | 1.05      | 8.69                |
| FBXO22 <sub>(RNA)</sub>                                                    | 8.14         | 0.61      | 4.96                |
| INIP <sub>(RNA)</sub>                                                      | 7.40         | 0.42      | 3.08                |
| RPS19 <sub>(RNA)</sub>                                                     | 5.75         | 0.44      | 2.52                |
| SEC61G <sub>(CN)</sub>                                                     | 4.53         | 1.30      | 5.90                |
| BAX <sub>(RNA)</sub>                                                       | 3.80         | 0.78      | 2.98                |
| RRP15 <sub>(RNA)</sub>                                                     | 3.46         | 0.47      | 1.62                |
| SERPINB1 <sub>(RNA)</sub>                                                  | 2.16         | 1.51      | 3.26                |
| DFFA <sub>(RNA)</sub>                                                      | -0.99        | 0.58      | -0.57               |
| FOXP1 <sub>(RNA)</sub>                                                     | -1.16        | 1.50      | -1.75               |
| DNAJC12 <sub>(RNA)</sub>                                                   | -2.26        | 1.18      | -2.66               |
| USP27X <sub>(RNA)</sub>                                                    | -4.18        | 0.47      | -1.95               |
| C12orf71 <sub>(RNA)</sub>                                                  | -7.07        | 0.04      | -0.26               |
| CEP70 <sub>(RNA)</sub>                                                     | -7.23        | 0.70      | -5.05               |
| TMPPRS7 <sub>(RNA)</sub>                                                   | -45.81       | 0.06      | -2.55               |
| <b>TMZ + BCL-X<sub>Li</sub>: GM Model</b>                                  |              |           |                     |
| (Intercept)                                                                | 184.26       |           |                     |
| DIAPH2 <sub>(RNA)</sub>                                                    | -4.14        | 1.01      | -4.18               |
| CASP9 <sub>(RNA)</sub>                                                     | -7.38        | 0.70      | -5.17               |
| CPTP <sub>(RNA)</sub>                                                      | -7.74        | 0.57      | -4.42               |
| MIB2 <sub>(RNA)</sub>                                                      | -11.16       | 0.77      | -8.55               |
| OTUB2 <sub>(RNA)</sub>                                                     | -22.64       | 0.43      | -9.62               |
| <b>IR + BCL-X<sub>Li</sub> ~ GM(*) Model</b>                               |              |           |                     |
| (Intercept)                                                                | 12.16        |           |                     |
| DDB2 <sub>(RNA)</sub> *NHEJ1 <sub>(RNA)</sub> *RNF19A <sub>(RNA)</sub>     | 0.38         | 28.01     | 10.61               |
| BAX <sub>(RNA)</sub> *NHEJ1 <sub>(RNA)</sub> *RNF19A <sub>(RNA)</sub>      | 0.14         | 34.50     | 4.90                |
| CASP9 <sub>(RNA)</sub> *FOXP1 <sub>(RNA)</sub> *SCML1 <sub>(RNA)</sub>     | -0.57        | 24.72     | -14.10              |
| <b>TMZ + BCL-X<sub>Li</sub> ~ GM(*) Model</b>                              |              |           |                     |
| (Intercept)                                                                | 57.55        |           |                     |
| CASP9 <sub>(RNA)</sub> *COBLL1 <sub>(RNA)</sub> *MIB2 <sub>(RNA)</sub>     | -0.12        | 22.83     | -2.67               |
| CASP9 <sub>(RNA)</sub> *COBLL1 <sub>(RNA)</sub> *PPP1R16A <sub>(RNA)</sub> | -0.18        | 19.65     | -3.49               |
| CASP9 <sub>(RNA)</sub> *COBLL1 <sub>(RNA)</sub> *STX18 <sub>(RNA)</sub>    | 0.02         | 17.34     | 0.40                |
| CASP9 <sub>(RNA)</sub> *CPTP <sub>(RNA)</sub> *STX4 <sub>(RNA)</sub>       | -0.11        | 24.85     | -2.76               |
| CASP9 <sub>(RNA)</sub> *DIAPH2 <sub>(RNA)</sub> *OTUB2 <sub>(RNA)</sub>    | -0.52        | 6.45      | -3.35               |
| CASP9 <sub>(RNA)</sub> *STX18 <sub>(RNA)</sub> *STX4 <sub>(RNA)</sub>      | -0.09        | 20.87     | -1.91               |
| CCDC96 <sub>(RNA)</sub> *FBXO48 <sub>(RNA)</sub>                           | -0.72        | 0.53      | -0.38               |
| CPTP <sub>(RNA)</sub> *DIAPH2 <sub>(RNA)</sub> *OTUB2 <sub>(RNA)</sub>     | -0.25        | 8.59      | -2.19               |
| CPTP <sub>(RNA)</sub> *FBXO48 <sub>(RNA)</sub>                             | -0.82        | 1.16      | -0.95               |
| CPTP <sub>(RNA)</sub> *OTUB2 <sub>(RNA)</sub>                              | -0.16        | 2.33      | -0.37               |
| CPTP <sub>(RNA)</sub> *STX18 <sub>(RNA)</sub> *STX4 <sub>(RNA)</sub>       | -0.07        | 22.74     | -1.63               |
| INAFM2 <sub>(RNA)</sub> *NHEJ1 <sub>(RNA)</sub>                            | 0.94         | 3.47      | 3.28                |
| INAFM2 <sub>(RNA)</sub> *NHEJ1 <sub>(RNA)</sub> *CHCHD3 <sub>(CN)</sub>    | 0.96         | 6.77      | 6.51                |

## Supplemental Table 4: Features for the IMF, GM and GM(\*) models

Features for the IMF, GM and GM(\*) models describing IR/TMZ + BCL-X<sub>L</sub> cell death with the final model intercepts and coefficient. Standard deviation (SD) and standardized coefficient are displayed to describe the contribution of each feature. Headings are in bold text.

**A**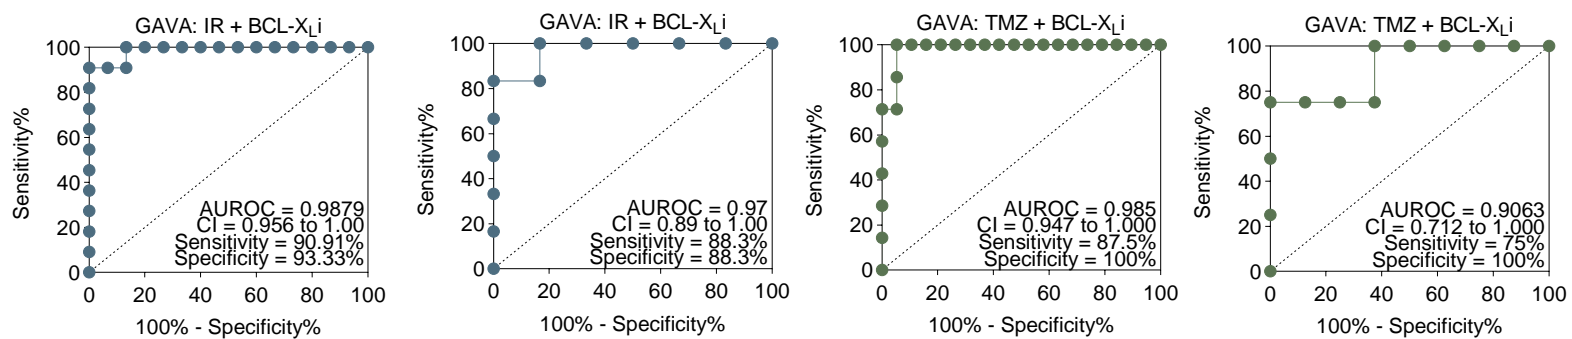**Supplemental Figure 7: Evaluation of IMF as a binary biomarker.**

A. ROC curves used to evaluate the GAVA model as a binary score.



**A**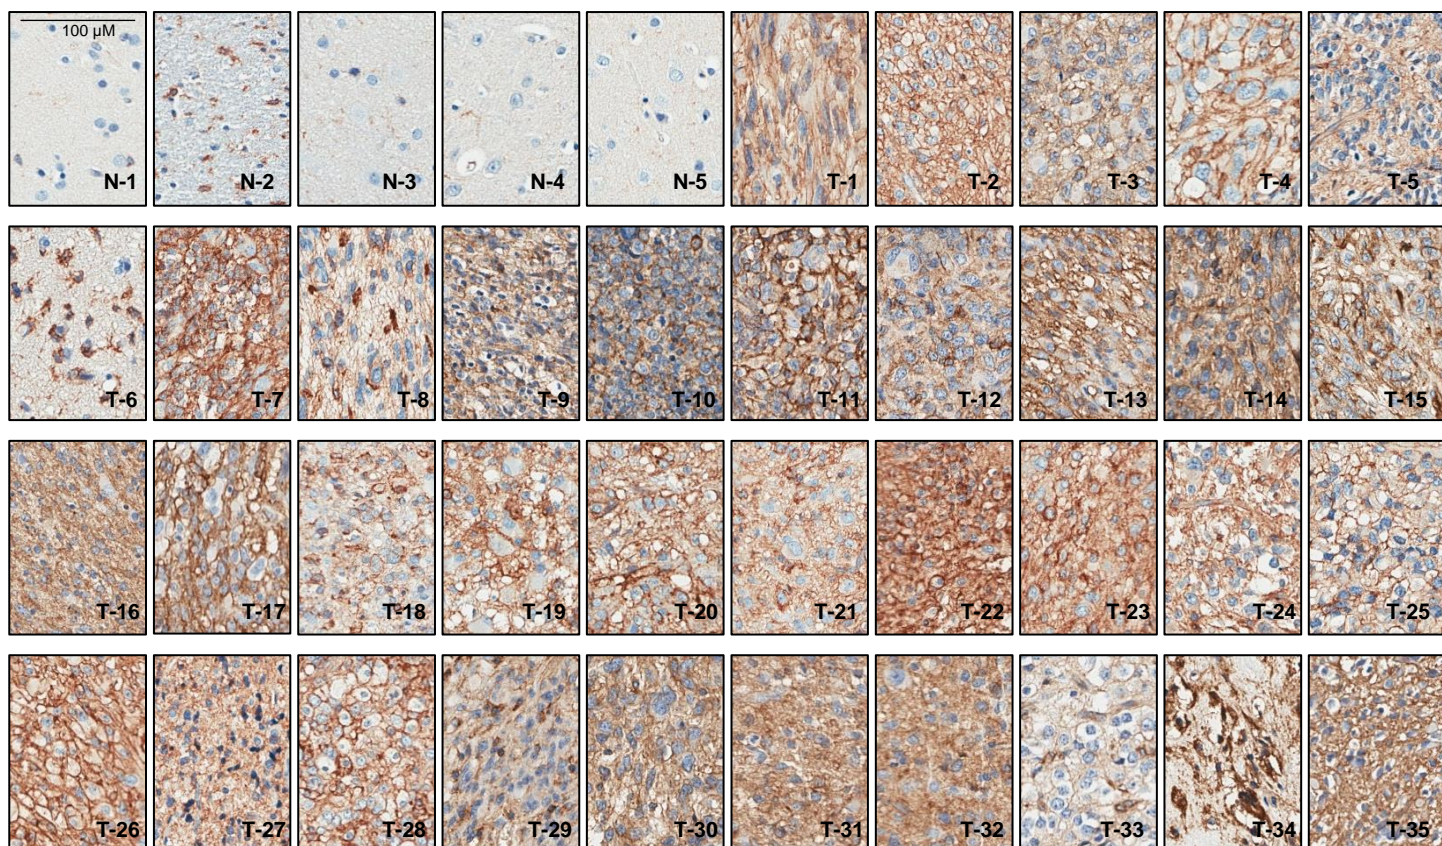**B**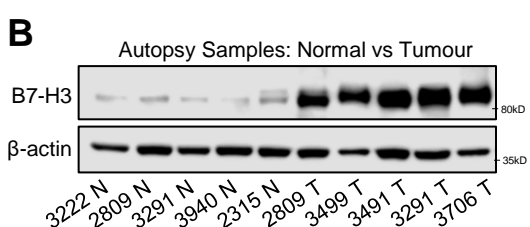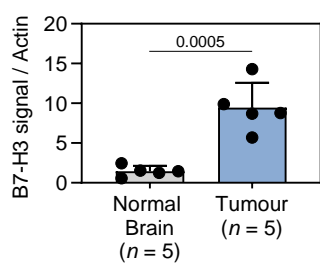**C**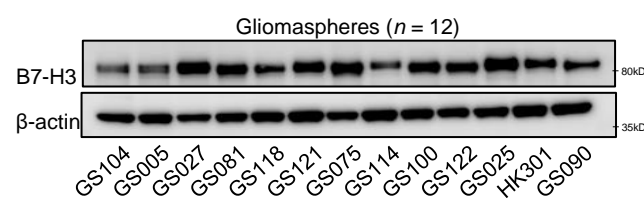**D**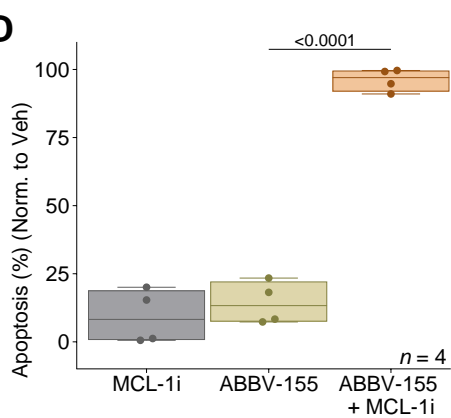**E**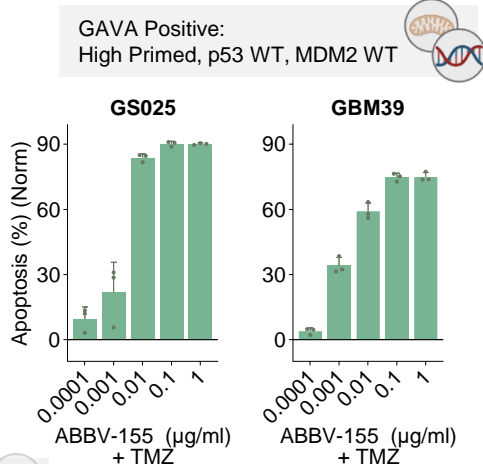**F**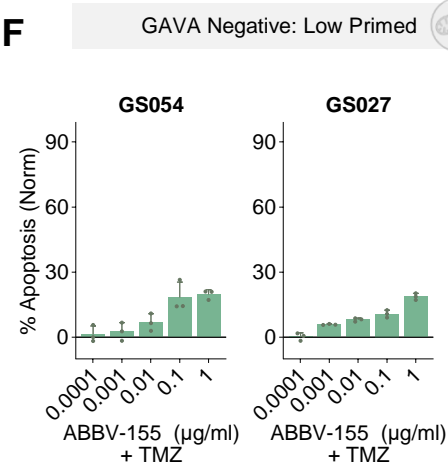**G**

GAVA Negative: mut-p53

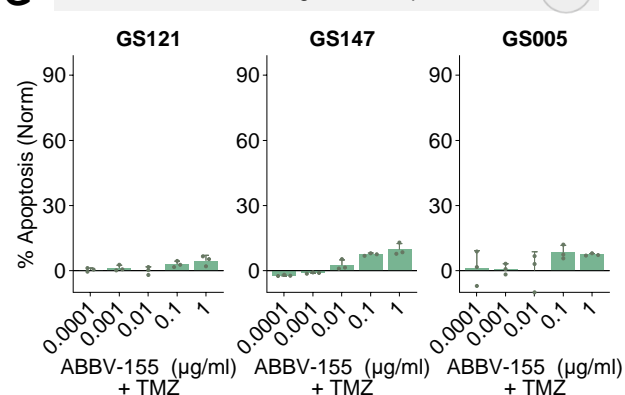**H**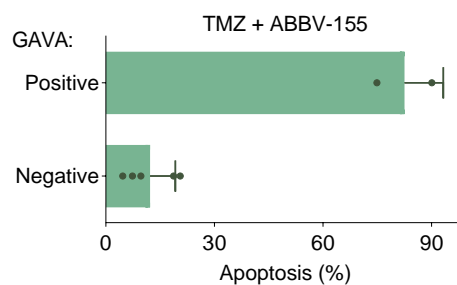**I**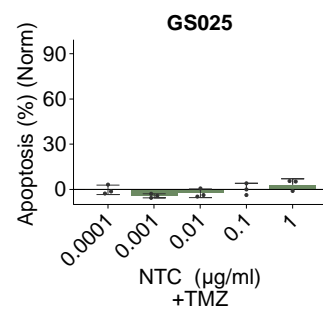

**Supplemental Fig. 8. Novel anti-body drug conjugate provides therapeutically safe alternative to targeting BCL-X<sub>L</sub> and is brain penetrant**

- A. Representative images from immunohistochemistry staining for B7-H3 (CD276) in GBM ( $n = 34$ ) and normal brain ( $n = 5$ ) microarray.
- B. Immunoblot and quantification of B7-H3 expression from normal brain (mean  $\pm$  s.d.,  $n = 5$ ) and autopsy samples (mean  $\pm$  s.d.,  $n = 5$ ). Comparisons were made with two-tailed, unpaired t tests.
- C. Immunoblot of B7-H3 expression in gliomaspheres ( $n = 12$ ).
- D. Apoptosis (Annexin V/PI) of p53 WT ( $n = 2$ ) and mut-p53 ( $n = 2$ ) gliomaspheres treated with 0.5 $\mu$ M MCL-1i (S63845) and 1 $\mu$ g/mL ABBV-155 for 5 days. Data are normalized to vehicle (mean  $\pm$  s.d., two-tailed, paired t test).
- E. Apoptosis (Annexin V/PI +) of GAVA positive, p53 WT and high primed gliomaspheres, GS025 and GBM39, 5 days post TMZ (50 $\mu$ M) and ABBV-155 titration. Concentration range: 0.0001 $\mu$ g/mL, 0.001 $\mu$ g/mL, 0.01 $\mu$ g/mL, 0.1 $\mu$ g/mL, 1 $\mu$ g/mL. Data are normalized to R alone (mean  $\pm$  s.d.,  $n = 3$  biological replicates).
- F. Apoptosis (Annexin V/PI +) of GAVA negative, low primed gliomaspheres, GS054 and GS027, 5 days post TMZ (50 $\mu$ M) and ABBV-155 titration. Concentration range: 0.0001 $\mu$ g/mL, 0.001 $\mu$ g/mL, 0.01 $\mu$ g/mL, 0.1 $\mu$ g/mL, 1 $\mu$ g/mL. Data are normalized to IR alone (mean  $\pm$  s.d.,  $n = 3$  biological replicates).
- G. Apoptosis (Annexin V/PI +) GAVA negative, mut-p53 gliomaspheres, GS121, GS147 and GS005, 5 days post TMZ (50 $\mu$ M) and ABBV-155 titration. Concentration range: 0.0001 $\mu$ g/mL, 0.001 $\mu$ g/mL, 0.01 $\mu$ g/mL, 0.1 $\mu$ g/mL, 1 $\mu$ g/mL. Data are normalized to R alone (mean  $\pm$  s.d.,  $n = 3$  biological replicates).
- H. Grouped analysis by GAVA status of all TMZ + 0.1 $\mu$ g/mL ABBV-155 cell death data (mean  $\pm$  s.d., student's two sample unpaired t test,  $n = 7$  gliomaspheres).
- I. Apoptosis (Annexin V/PI +) of p53 WT gliomaspheres, GS025, 5 days post IR (5 Gy) or TMZ (50 $\mu$ M) and Non-Targeting Control (NTC). Concentration range: 0.0001 $\mu$ g/mL, 0.001 $\mu$ g/mL, 0.01 $\mu$ g/mL, 0.1 $\mu$ g/mL, 1 $\mu$ g/mL. Data are normalized to either TMZ or IR alone (mean  $\pm$  s.d.,  $n = 3$  biological replicates).
